# Supplementary material
Source: Elsevier journal article supplement (https://comptes-rendus.academie-sciences.fr/chimie/article/10.1016/j.crci.2012.06.013/file/attach/mmc2.pdf)
Supplement: mmc2 [file mmc2.pdf]

# checkCIF/PLATON report

You have not supplied any structure factors. As a result the full set of tests cannot be run.

No syntax errors found.      CIF dictionary      Interpreting this report

## Datablock: I

---

Bond precision:    C-C = 0.0156 A                      Wavelength=0.71069

Cell:              a=12.6053(9)            b=20.6331(16)            c=15.5228(12)  
                    alpha=90                beta=96.134(7)            gamma=90

Temperature:      110 K

|                | Calculated         | Reported           |
|----------------|--------------------|--------------------|
| Volume         | 4014.2(5)          | 4014.1(5)          |
| Space group    | P 21               | P 1 21 1           |
| Hall group     | P 2yb              | P 2yb              |
| Moiety formula | C76 H92 Mn6 N6 O26 | C76 H92 Mn6 N6 O26 |
| Sum formula    | C76 H92 Mn6 N6 O26 | C76 H92 Mn6 N6 O26 |
| Mr             | 1835.20            | 1835.16            |
| Dx,g cm-3      | 1.518              | 1.518              |
| Z              | 2                  | 2                  |
| Mu (mm-1)      | 0.997              | 0.997              |
| F000           | 1896.0             | 1896.0             |
| F000'          | 1900.87            |                    |
| h,k,lmax       | 17,28,21           | 17,28,21           |
| Nref           | 11667[ 22739]      | 19000              |
| Tmin,Tmax      | 0.898,0.932        | 0.820,0.930        |
| Tmin'          | 0.776              |                    |

Correction method= ANALYTICAL

Data completeness= 1.63/0.84                      Theta(max)= 29.684

R(reflections)= 0.0727( 11223)                      wR2(reflections)= wR= 0.0846( 11223)

S = 1.095                                              Npar= 1028

---

The following ALERTS were generated. Each ALERT has the format

**test-name\_ALERT\_alert-type\_alert-level.**

Click on the hyperlinks for more details of the test.

---

### [IMAGE] Alert level B

|                                         |     |                       |        |       |
|-----------------------------------------|-----|-----------------------|--------|-------|
| PLAT220_ALERT_2_B Large Non-Solvent     | C   | Ueq(max)/Ueq(min) ... | 5.5    | Ratio |
| PLAT341_ALERT_3_B Low Bond Precision on | C-C | Bonds .....           | 0.0156 | Ang   |
| PLAT413_ALERT_2_B Short Inter XH3 ..    | XHn | H1501 .. H261 ..      | 2.02   | Ang.  |

|                   |                        |       |    |       |     |      |      |
|-------------------|------------------------|-------|----|-------|-----|------|------|
| PLAT413_ALERT_2_B | Short Inter XH3 .. XHn | H2032 | .. | H841  | ..  | 2.00 | Ang. |
| PLAT420_ALERT_2_B | D-H Without Acceptor   | O125  | -  | H1252 | ... | ?    |      |
| PLAT420_ALERT_2_B | D-H Without Acceptor   | O145  | -  | H1452 | ... | ?    |      |
| PLAT420_ALERT_2_B | D-H Without Acceptor   | O201  | -  | H102  | ... | ?    |      |

---

[IMAGE] **Alert level C**

|                   |                                               |                                  |                     |      |     |       |       |
|-------------------|-----------------------------------------------|----------------------------------|---------------------|------|-----|-------|-------|
| PLAT029_ALERT_3_C | _diffn_measured_fraction_theta_full           | Low                              | .....               |      |     | 0.973 |       |
| PLAT213_ALERT_2_C | Atom C6                                       | has ADP max/min Ratio            | ....                |      |     | 3.4   | prola |
| PLAT222_ALERT_3_C | Large Non-Solvent                             | H                                | Uiso(max)/Uiso(min) | ..   |     | 5.3   | Ratio |
| PLAT234_ALERT_4_C | Large Hirshfeld Difference                    | O211                             | --                  | C212 | ..  | 0.17  | Ang.  |
| PLAT234_ALERT_4_C | Large Hirshfeld Difference                    | C212                             | --                  | C213 | ..  | 0.18  | Ang.  |
| PLAT241_ALERT_2_C | Check High                                    | Ueq as Compared to Neighbors for |                     |      |     | O1    |       |
| PLAT241_ALERT_2_C | Check High                                    | Ueq as Compared to Neighbors for |                     |      |     | C128  |       |
| PLAT241_ALERT_2_C | Check High                                    | Ueq as Compared to Neighbors for |                     |      |     | C148  |       |
| PLAT242_ALERT_2_C | Check Low                                     | Ueq as Compared to Neighbors for |                     |      |     | Mn5   |       |
| PLAT360_ALERT_2_C | Short C(sp3)-C(sp3) Bond                      | C172                             | -                   | C173 | ... | 1.42  | Ang.  |
| PLAT360_ALERT_2_C | Short C(sp3)-C(sp3) Bond                      | C212                             | -                   | C213 | ... | 1.41  | Ang.  |
| PLAT415_ALERT_2_C | Short Inter D-H..H-X                          | H1252                            | ..                  | H891 | ..  | 2.13  | Ang.  |
| PLAT416_ALERT_2_C | Short Intra D-H..H-D                          | H104                             | ..                  | H105 | ..  | 1.97  | Ang.  |
| PLAT790_ALERT_4_C | Centre of Gravity not Within Unit Cell: Resd. | #                                |                     |      |     | 1     |       |
|                   | C76 H92 Mn6 N6 O26                            |                                  |                     |      |     |       |       |

---

[IMAGE] **Alert level G**

REFLT03\_ALERT\_4\_G Please check that the estimate of the number of Friedel pairs is correct. If it is not, please give the correct count in the \_publ\_section\_exptl\_refinement section of the submitted CIF.

|                                               |         |
|-----------------------------------------------|---------|
| From the CIF: _diffn_reflms_theta_max         | 29.68   |
| From the CIF: _reflms_number_total            | 19000   |
| Count of symmetry unique reflms               | 11667   |
| Completeness (_total/calc)                    | 162.85% |
| TEST3: Check Friedels for noncentro structure |         |
| Estimate of Friedel pairs measured            | 7333    |
| Fraction of Friedel pairs measured            | 0.629   |
| Are heavy atom types Z>Si present             | yes     |

|                   |                                                  |          |    |      |    |      |      |
|-------------------|--------------------------------------------------|----------|----|------|----|------|------|
| PLAT007_ALERT_5_G | Note: Number of Unrefined D-H Atoms              | .....    |    |      |    | 8    |      |
| PLAT232_ALERT_2_G | Hirshfeld Test Diff (M-X)                        | Mn4      | -- | O121 | .. | 5.7  | su   |
| PLAT432_ALERT_2_G | Short Inter X...Y Contact                        | C7       | .. | C63  | .. | 3.18 | Ang. |
| PLAT432_ALERT_2_G | Short Inter X...Y Contact                        | C23      | .. | C107 | .. | 3.17 | Ang. |
| PLAT720_ALERT_4_G | Number of Unusual/Non-Standard Labels            | .....    |    |      |    | 51   |      |
| PLAT791_ALERT_4_G | Note: The Model has Chirality at C124            | (Verify) |    |      |    | S    |      |
| PLAT791_ALERT_4_G | Note: The Model has Chirality at C144            | (Verify) |    |      |    | S    |      |
| PLAT808_ALERT_5_G | No Parseable SHELXL Style Weighting Scheme Found |          |    |      |    | !    |      |
| PLAT860_ALERT_3_G | Note: Number of Least-Squares Restraints         | .....    |    |      |    | 97   |      |

---

0 **ALERT level A** = Most likely a serious problem - resolve or explain  
7 **ALERT level B** = A potentially serious problem, consider carefully  
14 **ALERT level C** = Check. Ensure it is not caused by an omission or oversight  
10 **ALERT level G** = General information/check it is not something unexpected

0 ALERT type 1 CIF construction/syntax error, inconsistent or missing data  
18 ALERT type 2 Indicator that the structure model may be wrong or deficient  
4 ALERT type 3 Indicator that the structure quality may be low  
7 ALERT type 4 Improvement, methodology, query or suggestion  
2 ALERT type 5 Informative message, check

---

---

## Publication of your CIF

You should attempt to resolve as many as possible of the alerts in all categories. Often the minor alerts point to easily fixed oversights, errors and omissions in your CIF or refinement strategy, so attention to these fine details can be worthwhile. In order to resolve some of the more serious problems it may be necessary to carry out additional measurements or structure refinements. However, the nature of your study may justify the reported deviations from journal submission requirements and the more serious of these should be commented upon in the discussion or experimental section of a paper or in the "special\_details" fields of the CIF. *checkCIF* was carefully designed to identify outliers and unusual parameters, but every test has its limitations and alerts that are not important in a particular case may appear. Conversely, the absence of alerts does not guarantee there are no aspects of the results needing attention. It is up to the individual to critically assess their own results and, if necessary, seek expert advice.

If you wish to submit your CIF for publication in Acta Crystallographica Section C or E, you should upload your CIF via the web. If your CIF is to form part of a submission to another IUCr journal, you will be asked, either during electronic submission or by the Co-editor handling your paper, to upload your CIF via our web site.

---

**PLATON version of 21/12/2011; check.def file version of 16/12/2011**

## Datablock I - ellipsoid plot

[IMAGE]
